# Supplementary material
Source: Springer Nature journal article supplement (https://www.springermedizin.de/resource/supplementary/12933_2005_38_MOESM7_ESM.pdf/9539486)

# Histological findings from breast biopsy 2003:

## Calciphylaxis

Vascular calcification involving intima (a), media (b), adventitia (c)

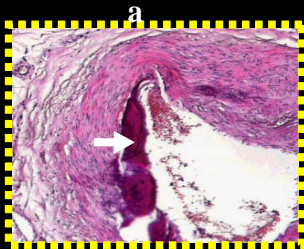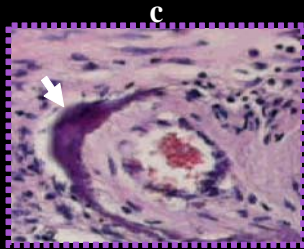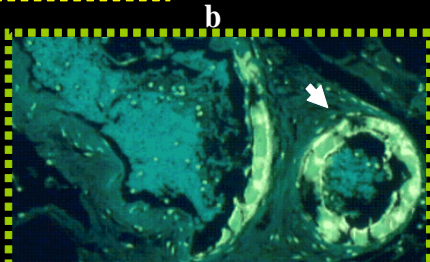

Supplement: MOESM7 [file 9539486]
